# Supplementary material for: The antioxidant compound tert-butylhydroquinone activates Akt in myocardium, suppresses apoptosis and ameliorates pressure overload-induced cardiac dysfunction
Source: PubMed Central journal article supplement (PMC4531315; doi:10.1038/srep13005), 2015-08-11
Supplement: srep13005-s1.pdf [file srep13005-s1.pdf]

**The antioxidant compound tert-butylhydroquinone activates Akt in myocardium,  
suppresses apoptosis and ameliorates pressure overload-induced cardiac  
dysfunction**

**Authors:**

**Yongtao Zhang**

**Fang Fang Liu**

**Xiaolei Bi**

**Shuangxi Wang**

**Xiao Wu**

**Fan Jiang**

## Supplemental Figure S1

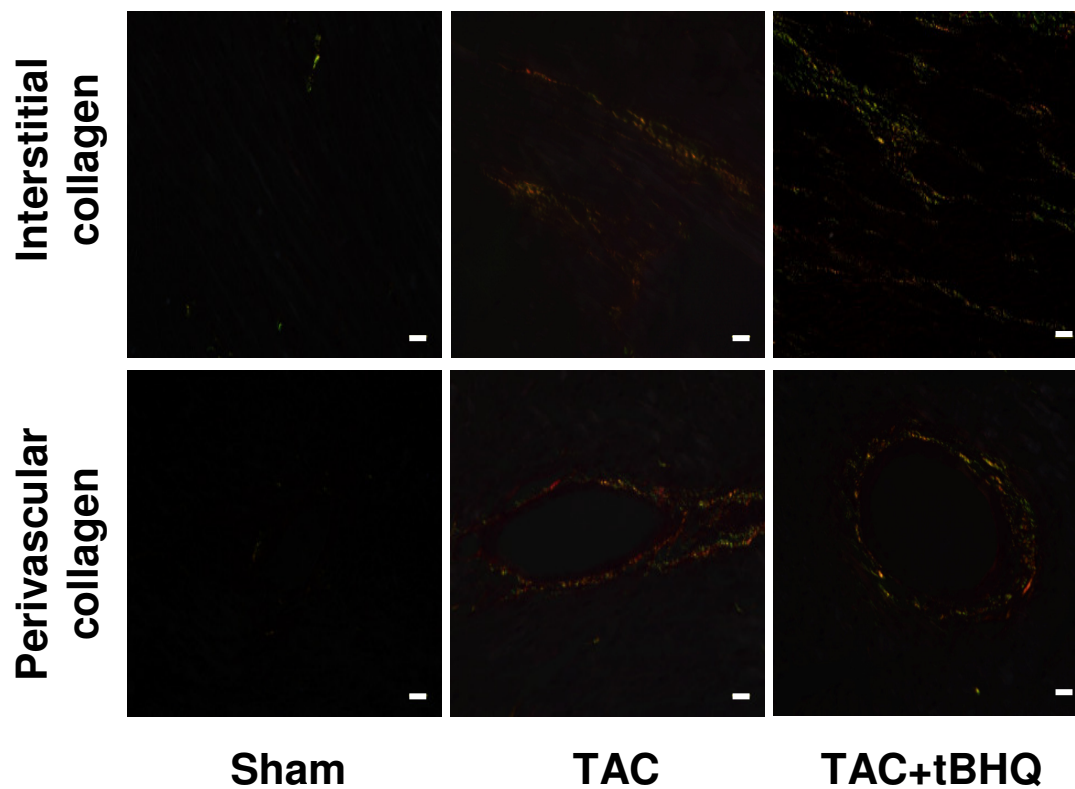

Polarization microscopy images of picosirius red staining of LV tissues showing the effects of TAC and TAC+tBHQ on the degree of interstitial and perivascular fibrosis. Images were taken with a light microscope (Olympus BX-51). Bar = 20  $\mu$ m.

## Supplemental Figure S2

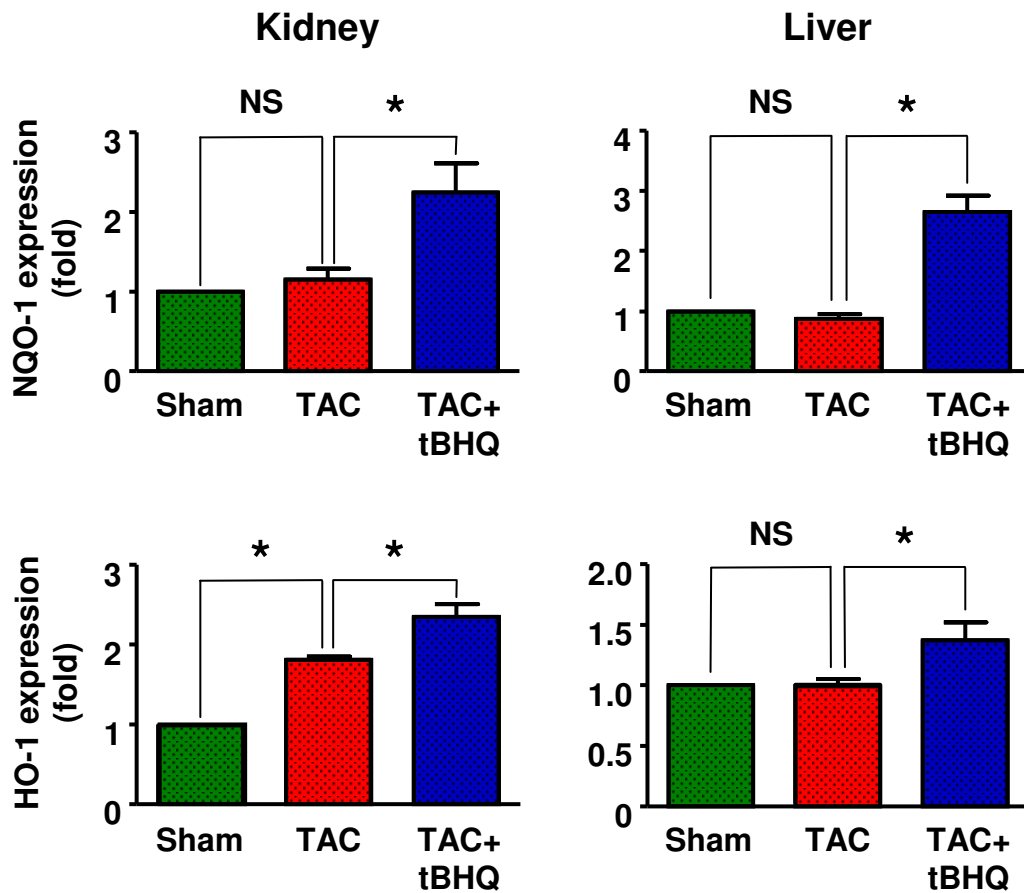

PCR results showing the expression levels of the Nrf2 target genes NQO1 and HO-1 in the kidney and liver in sham, TAC and TAC+TBHQ treated animals. \*  $P < 0.05$ , one-way ANOVA ( $n = 6$ ). NS, no significance.

## Supplemental Figure S3

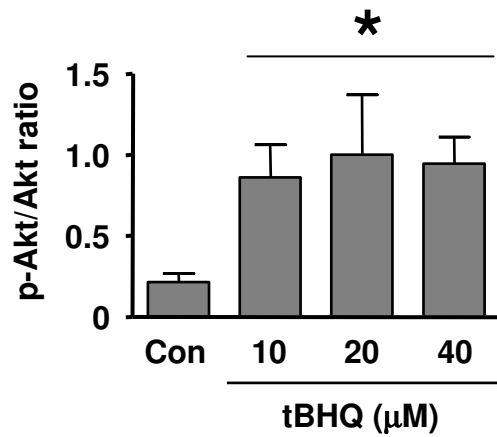

Quantitative densitometry data of the western blot in Figure 8A showing the effects of TBHQ treatment at different concentrations on Akt phosphorylation in cultured H9c2 cells. \*  $P < 0.05$ , one-way ANOVA versus control ( $n = 4$ ).

## Supplemental Figure S4

(A)

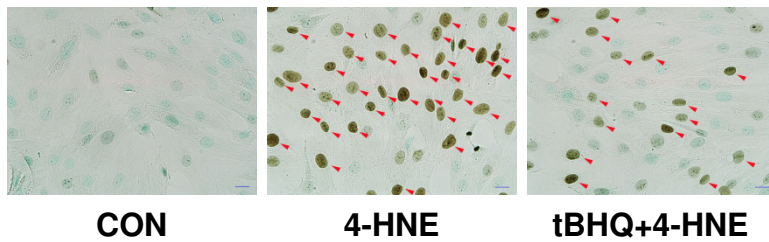

(B)

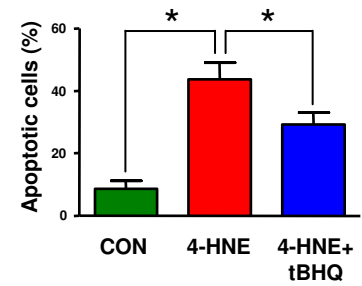

TUNEL staining in cultured H9c2 cells showing the effect of tBHQ (20  $\mu$ M) pretreatment on 4-HNE (20  $\mu$ M for 24 hr)-induced apoptosis. (A) Arrow heads indicate the nuclei of apoptotic cells. (B) Cell counting data for (A). \*  $P < 0.05$ , one-way ANOVA,  $n = 3$  independent experiments.

## Supplemental Figure S5

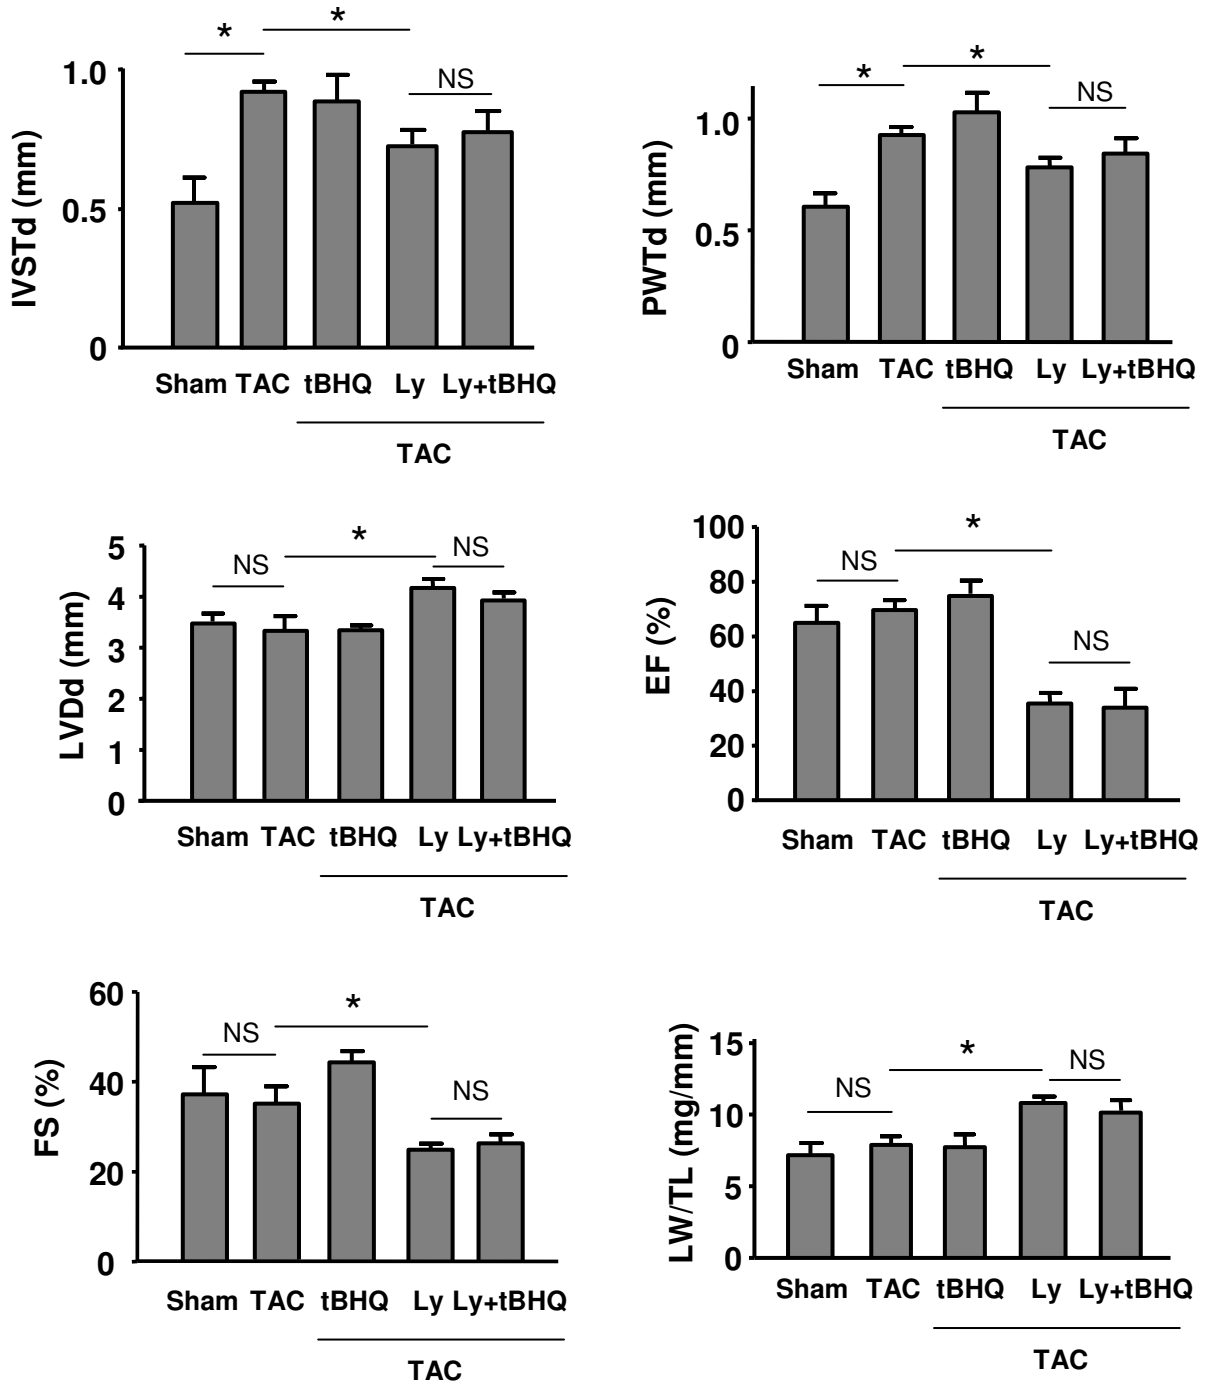

Effects of LY294002 co-treatment in vivo on the actions of TBHQ on echocardiography parameters of cardiac structure and function, and the relative lung weight at 2 weeks after TAC. \*  $P < 0.05$ , one-way ANOVA ( $n = 6$ ). NS, no significance. LW/TL, lung weight to tibia length ratio.

## Supplemental Figure S6

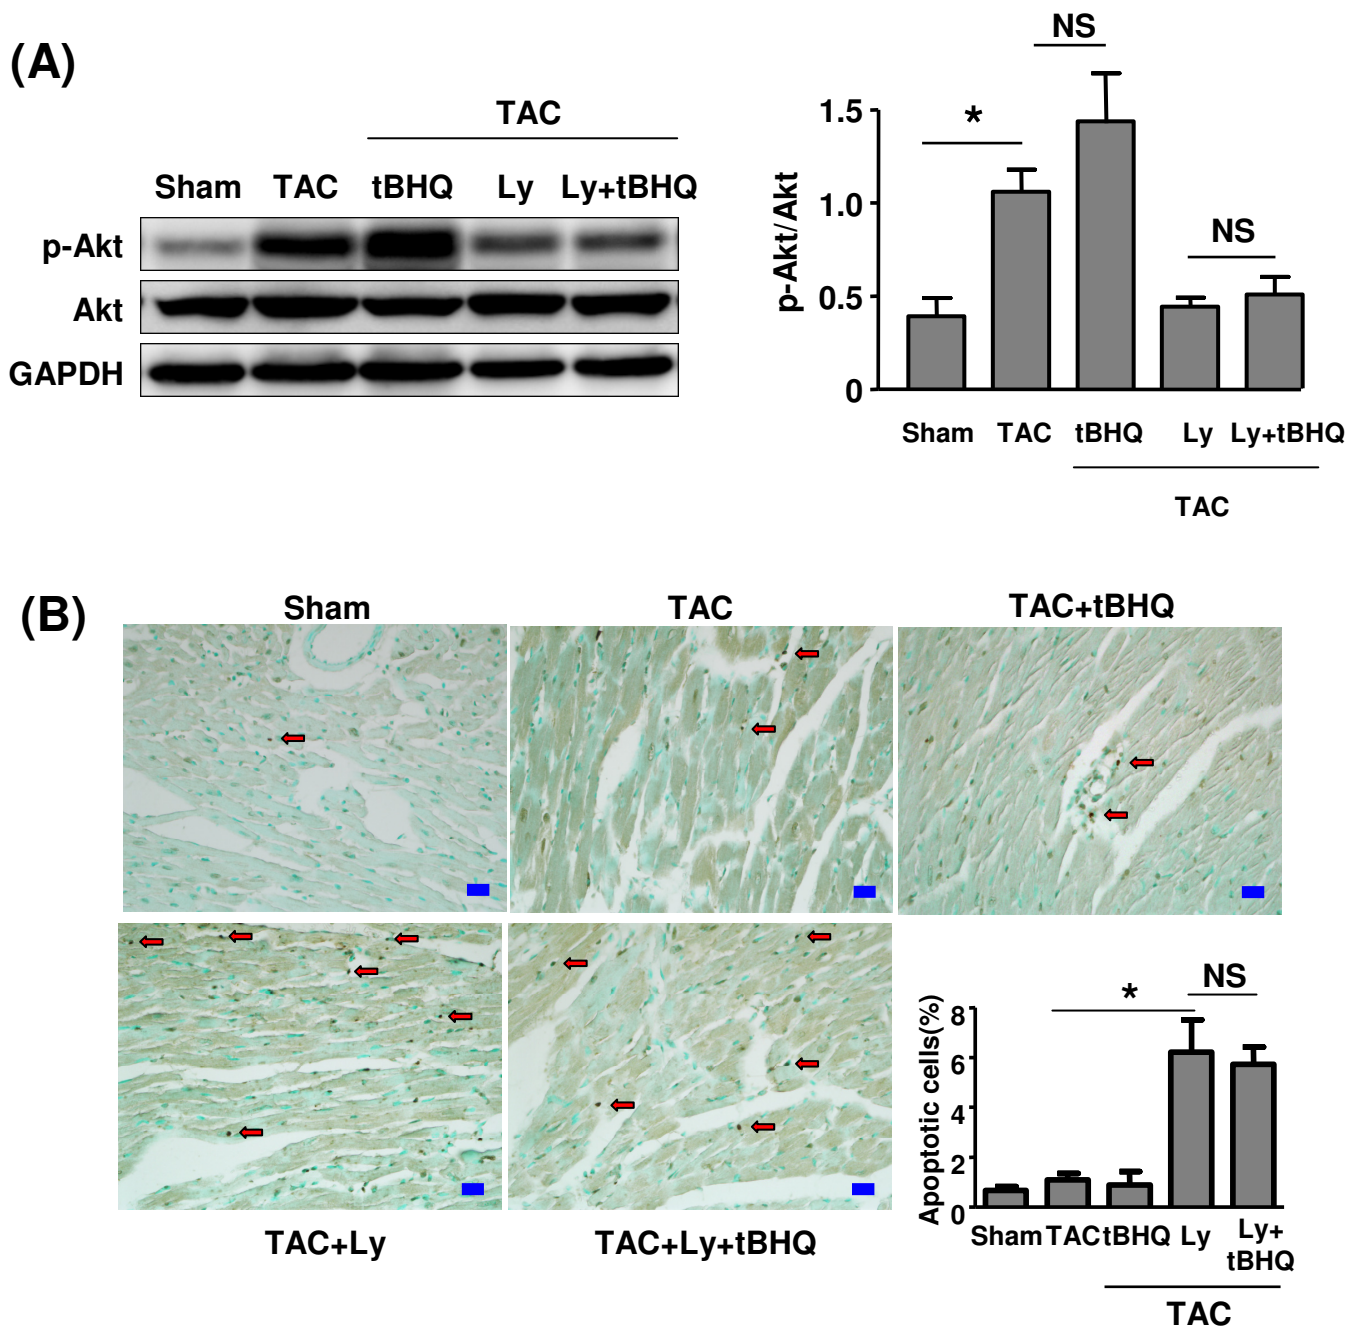

Effects of LY294002 co-treatment in vivo on the actions of TBHQ on (A) Akt phosphorylation level and (B) cell apoptosis at 2 weeks after TAC. \*  $P < 0.05$ , one-way ANOVA ( $n = 6$ ). NS, no significance.

## Supplemental Figure S7

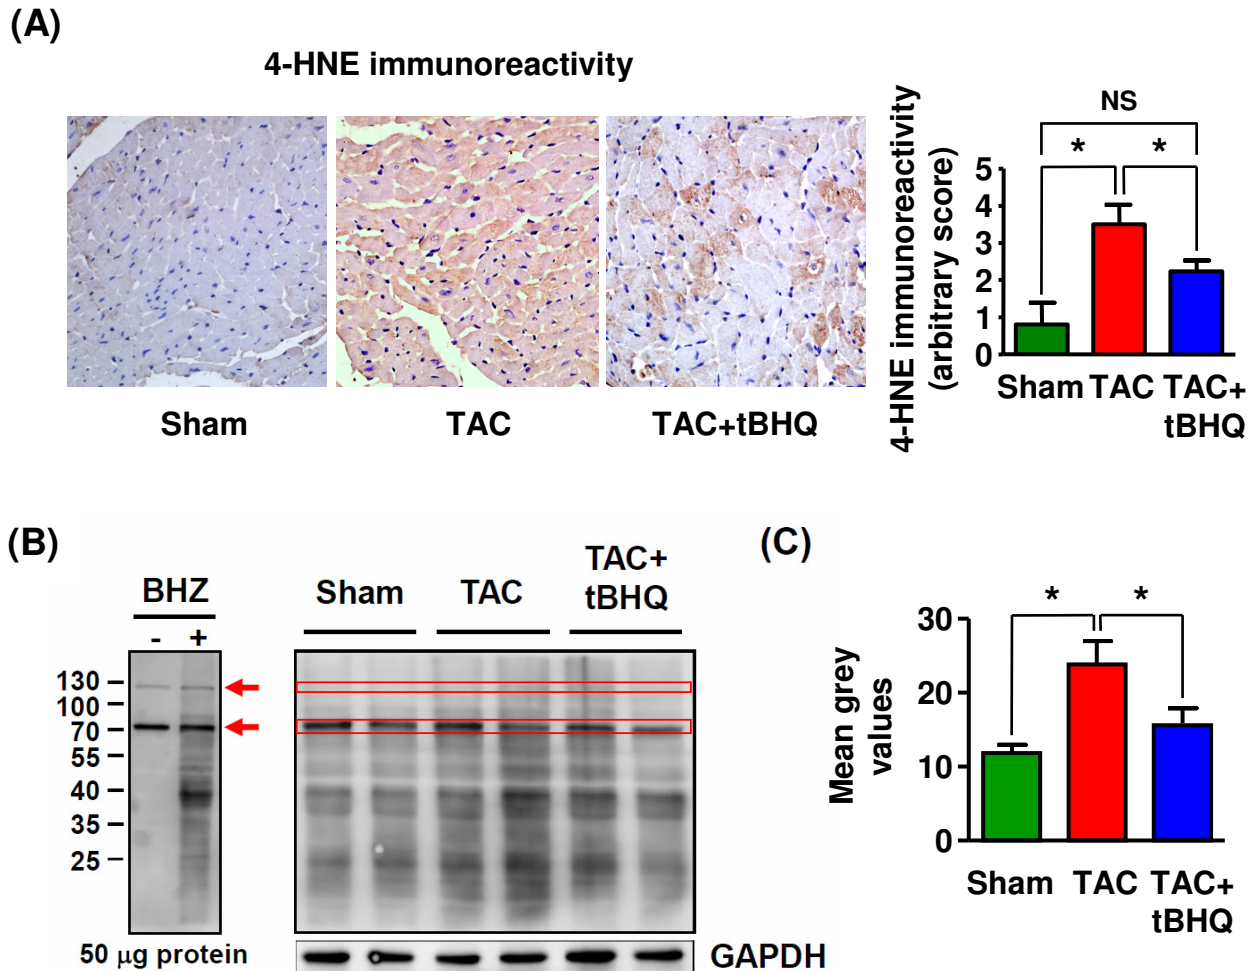

Effects of TBHQ on reactive aldehyde production and protein carbonylation in LV tissues. (A) Immunohistochemistry staining for 4-HNE (brown color) and the corresponding semi-quantitative data. Sections were counter stained with hematoxylin. (B) Carbonylated proteins in the myocardium detected by biotin-hydrazide (BHZ) labeling followed by western blotting. Left panel shows protein samples without and with BHZ labeling. Arrows and boxes indicated the non-specific endogenous biotin-containing proteins. (C) Quantitative analysis of the blots. The mean grey density values for each lane were obtained by selecting the entire area excluding the non-specific signals enclosed by the red boxes, followed by densitometry measurements using Image J software. \*  $P < 0.05$ , one-way ANOVA ( $n = 6$ ).
